# Supplementary figures and images for: Measures and models for causal inference in cross-sectional studies: arguments for the appropriateness of the prevalence odds ratio and related logistic regression
Source: Springer Nature journal article supplement (doi:10.1186/1471-2288-10-66), 2010-07-15

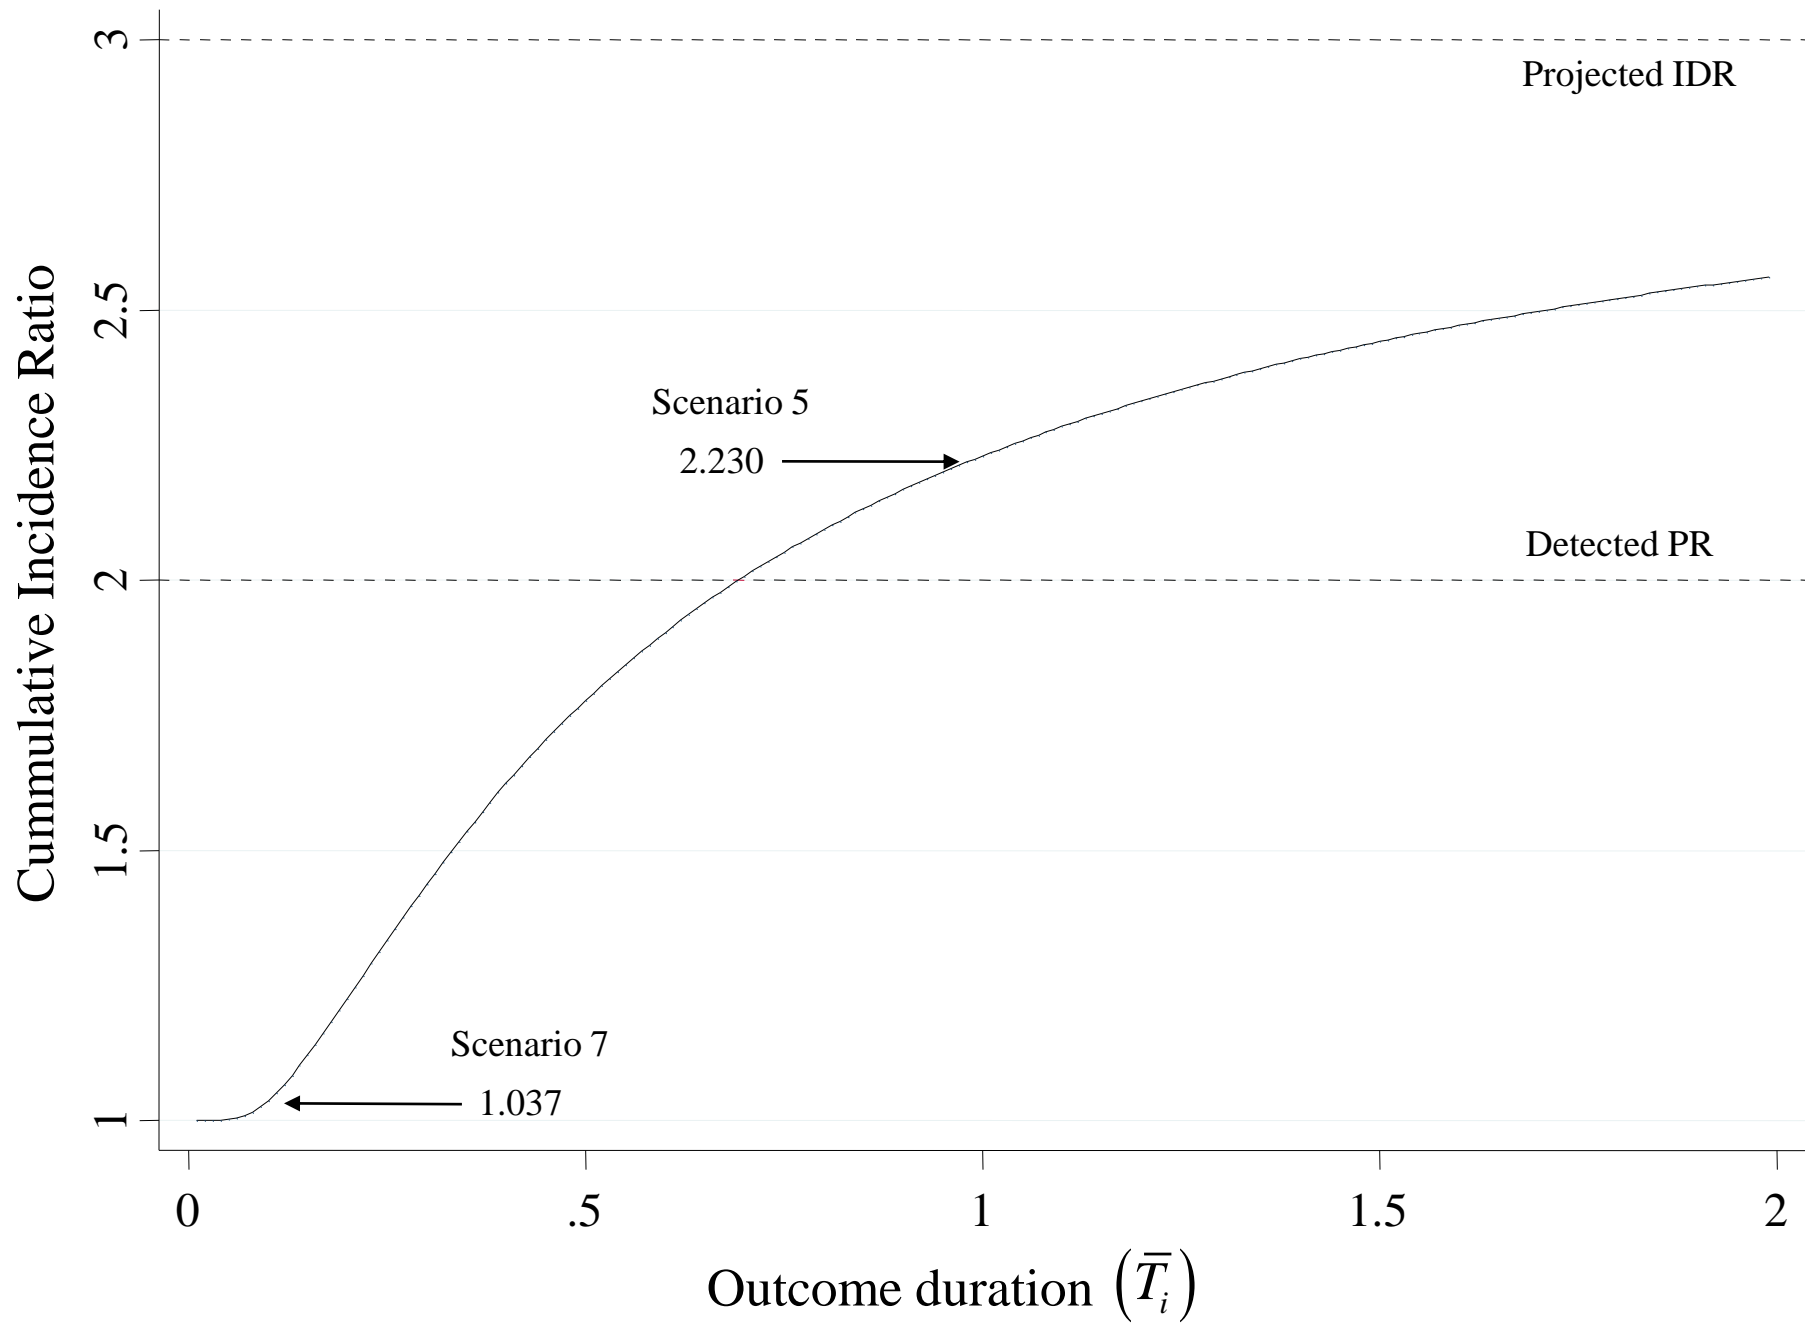

Supplement: 12874_2010_469_MOESM1_ESM.pdf [file 12874_2010_469_MOESM1_ESM.pdf]

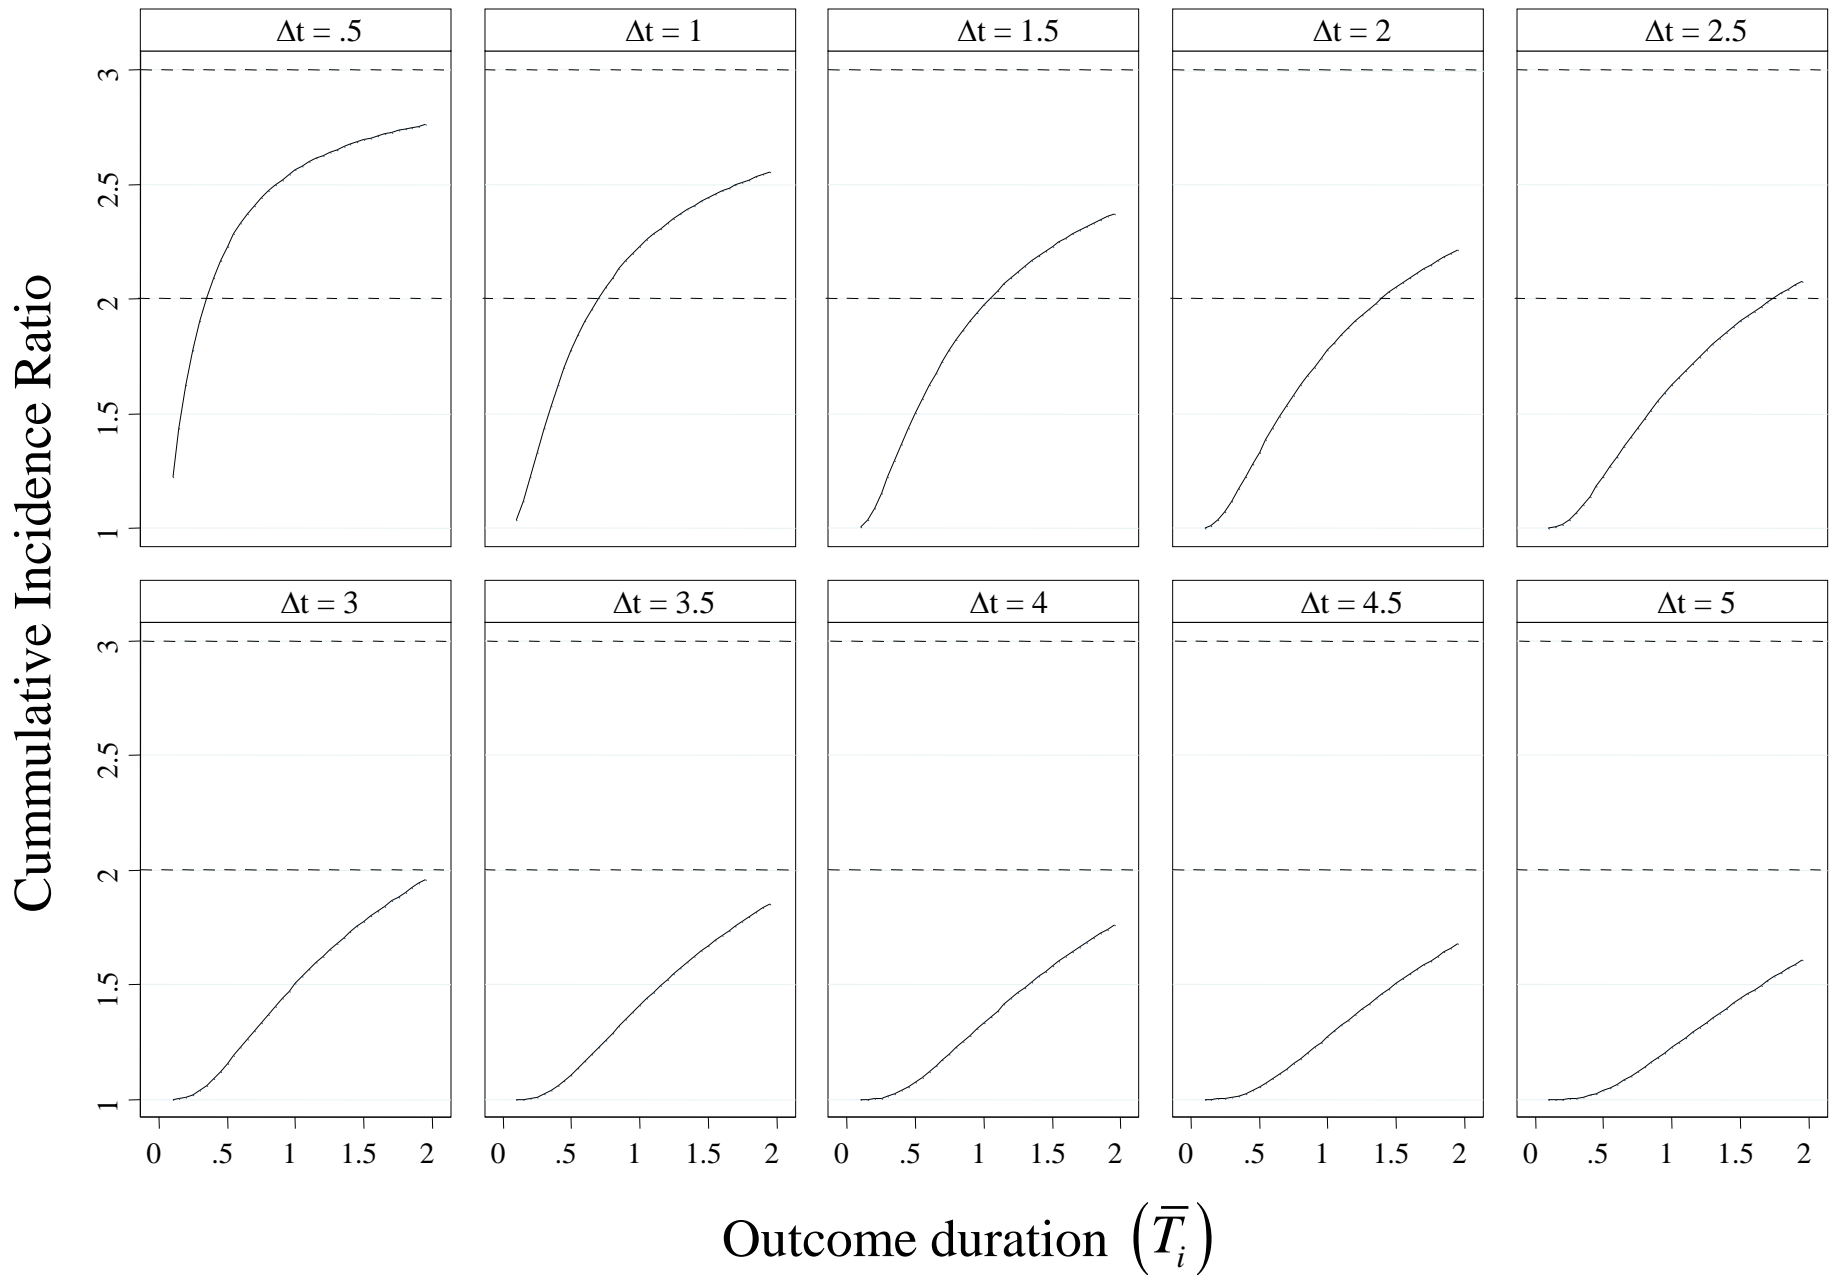

Graphs by follow-up (risk period)

Supplement: 12874_2010_469_MOESM2_ESM.pdf [file 12874_2010_469_MOESM2_ESM.pdf]

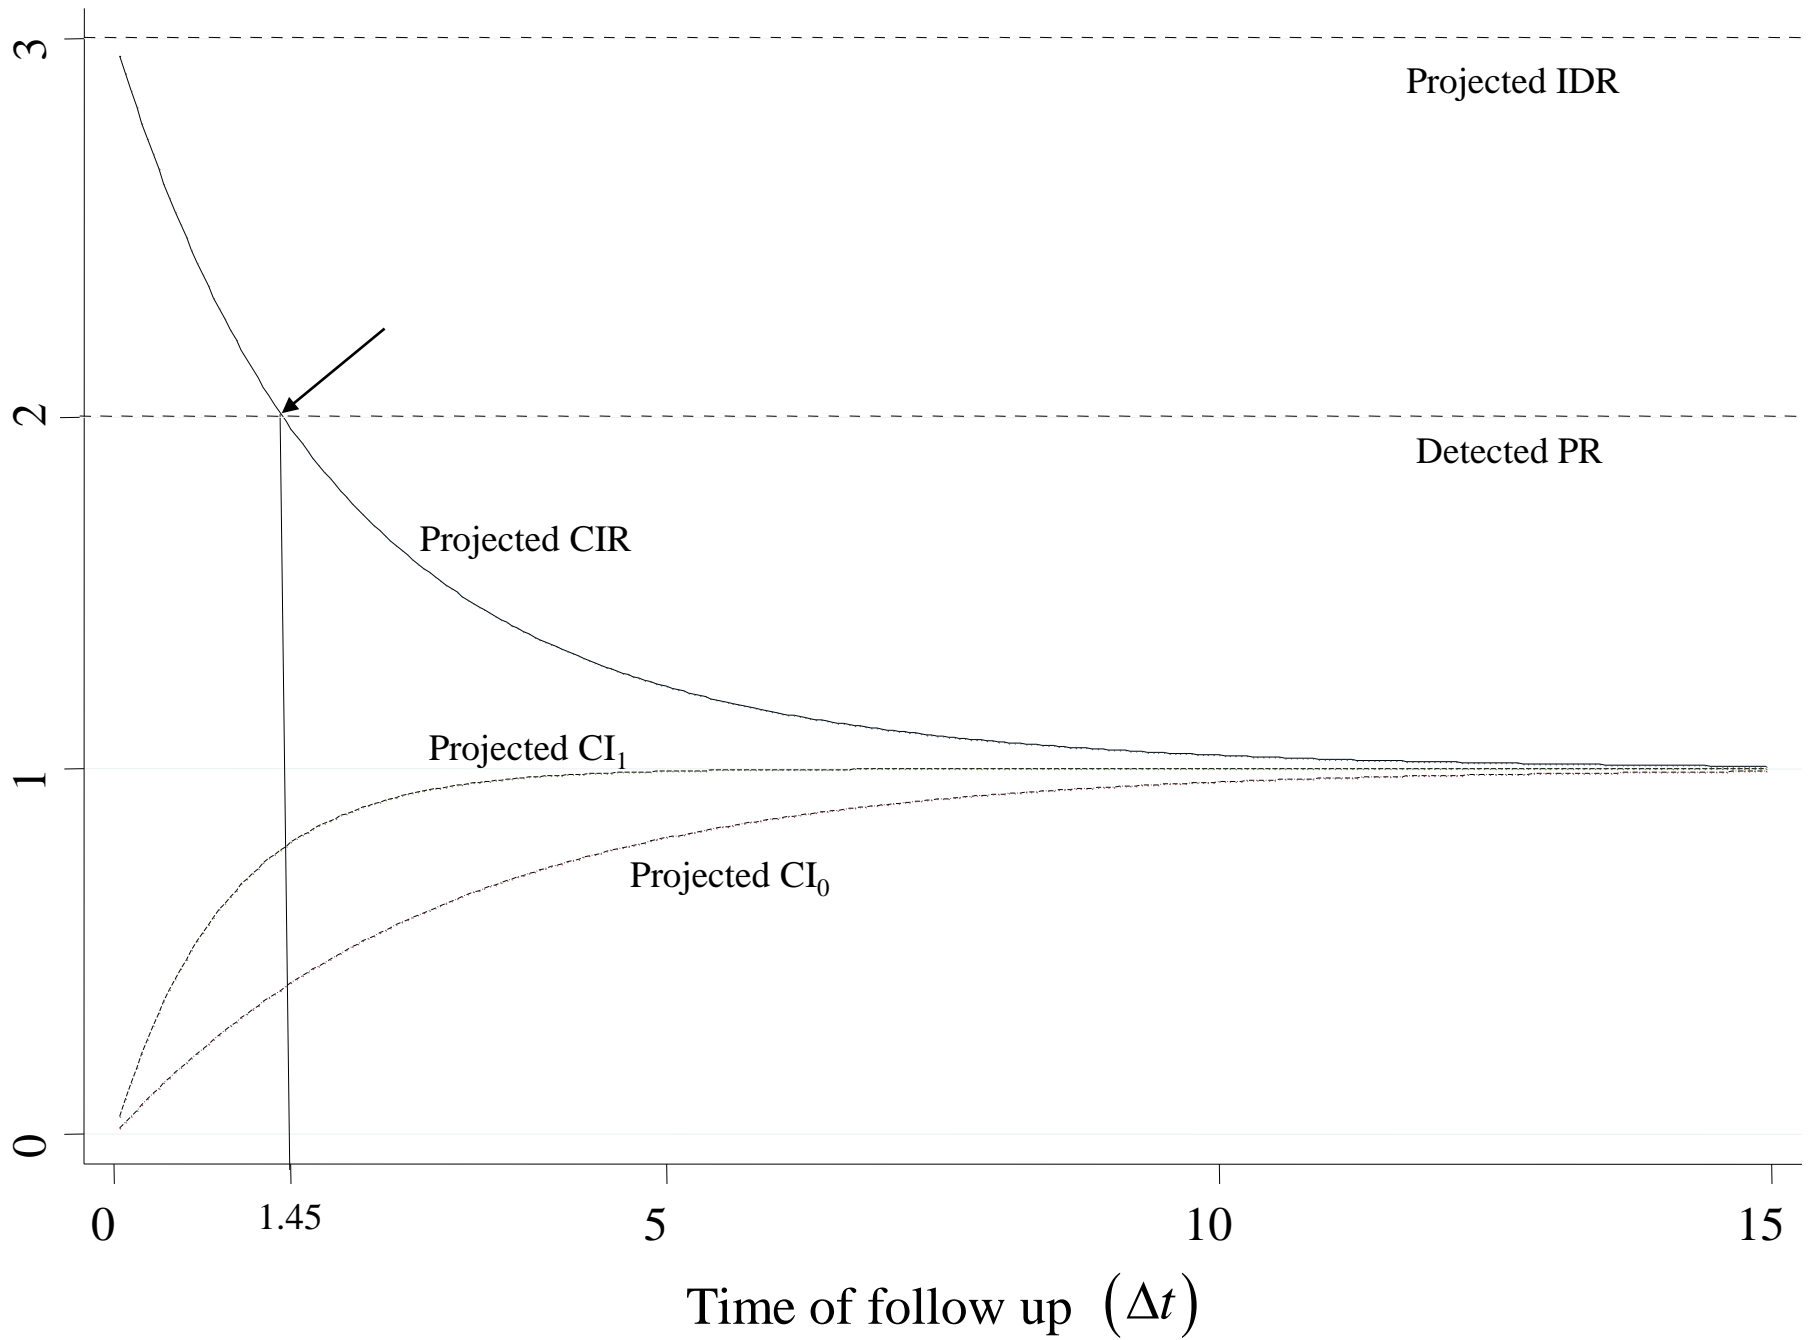

Supplement: 12874_2010_469_MOESM3_ESM.pdf [file 12874_2010_469_MOESM3_ESM.pdf]

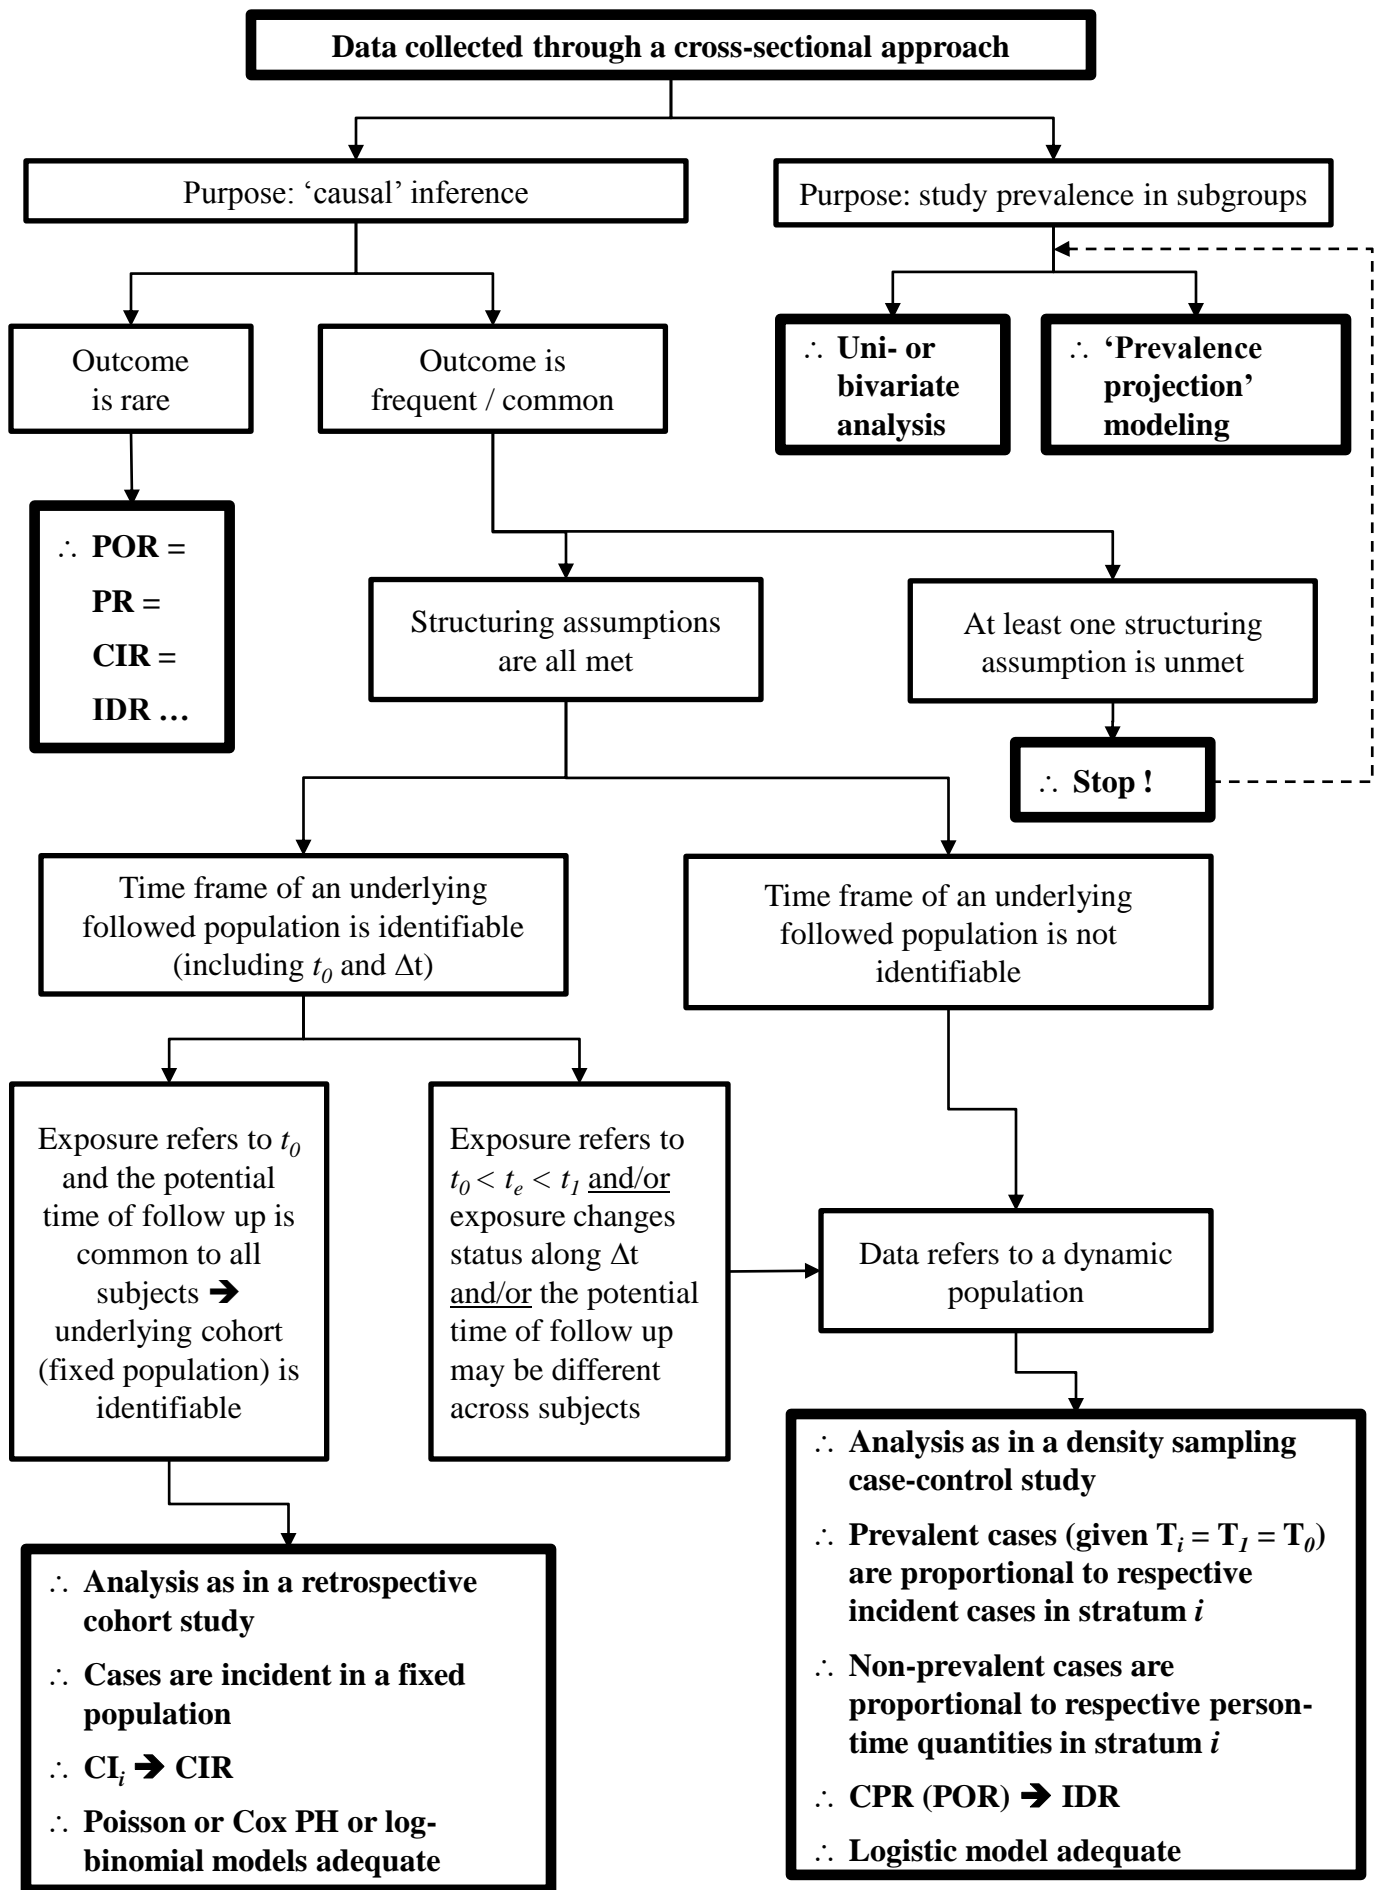

Supplement: 12874_2010_469_MOESM4_ESM.pdf [file 12874_2010_469_MOESM4_ESM.pdf]
